# Supplementary material for: Pseudorabies virus infection inhibits autophagy in permissive cells in vitro
Source: PubMed Central journal article supplement (PMC5216355; doi:10.1038/srep39964), 2017-01-06
Supplement: srep39964-s1.pdf [file srep39964-s1.pdf]

**Pseudorabies virus infection inhibits autophagy  
in permissive cells *in vitro***

Mingxia Sun<sup>a</sup>, Linlin Hou<sup>a,b</sup>, Yandong Tang<sup>a</sup>, Yonggang Liu<sup>a</sup>, Shujie Wang<sup>a</sup>, Jingfei  
Wang<sup>a</sup>, Nan Shen<sup>a</sup>, Tongqing An<sup>a</sup>, Zhijun Tian<sup>a</sup>, Xuehui Cai<sup>a\*</sup>

## Figure S1 PRV infection modified LC3 lipidation after infection

Figure S1 showed the raw uncropped images of figure 1a,b and c.

Figure 1a

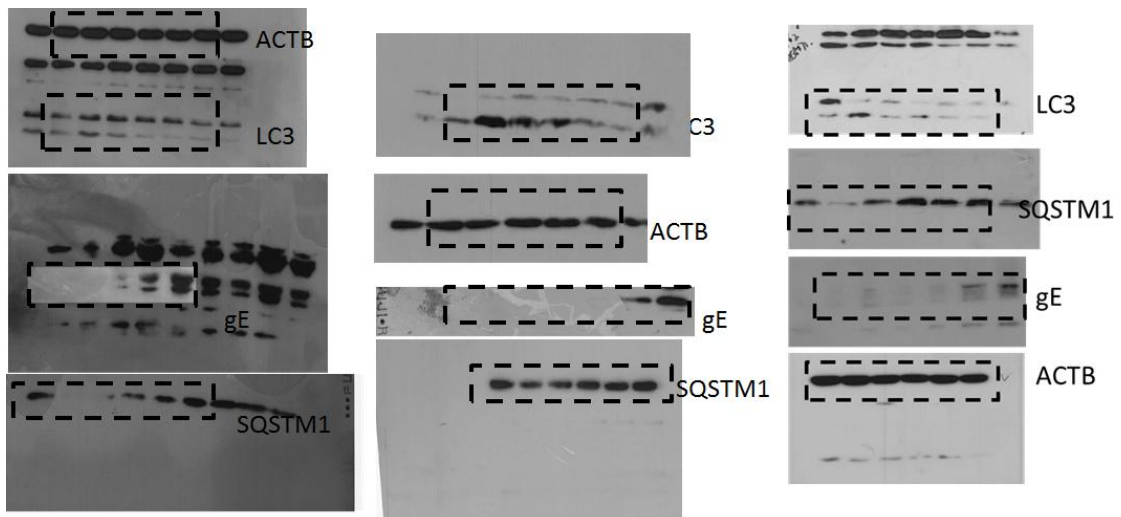

Figure 1b

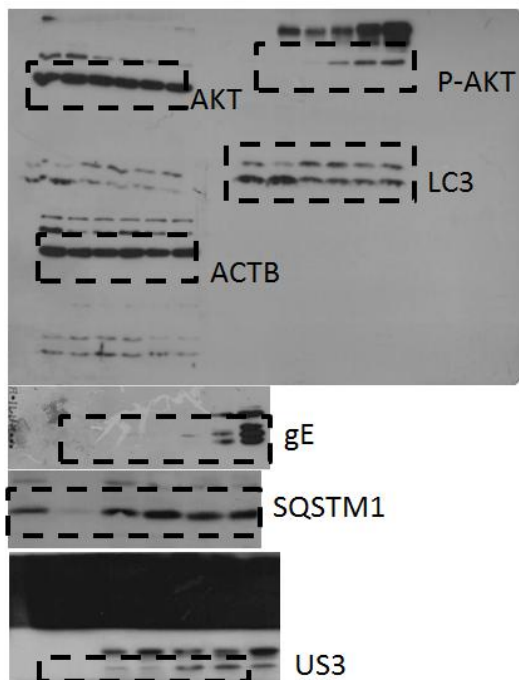

Figure 1c

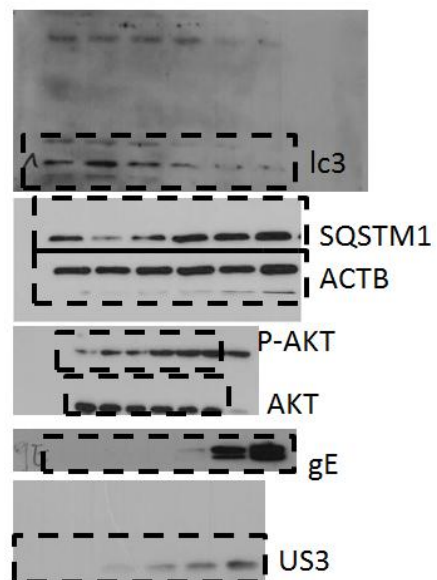

### Figure S2 autophagy flux in PRV infected cells

Figure S2 showed the raw uncropped images of figure4a.

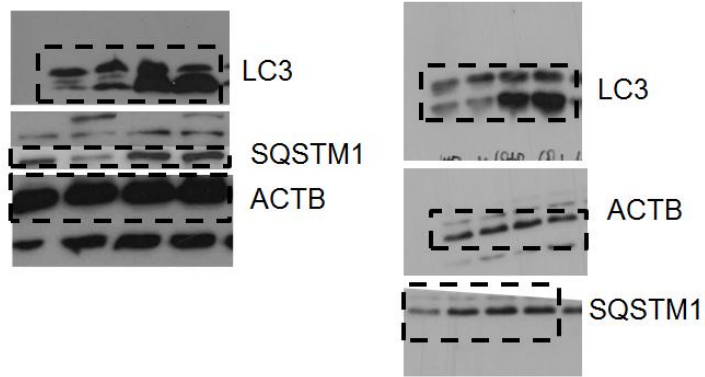

### Figure S3 autophagy and viral replication

Figure S3 showed the raw uncropped images of figure5a and b.

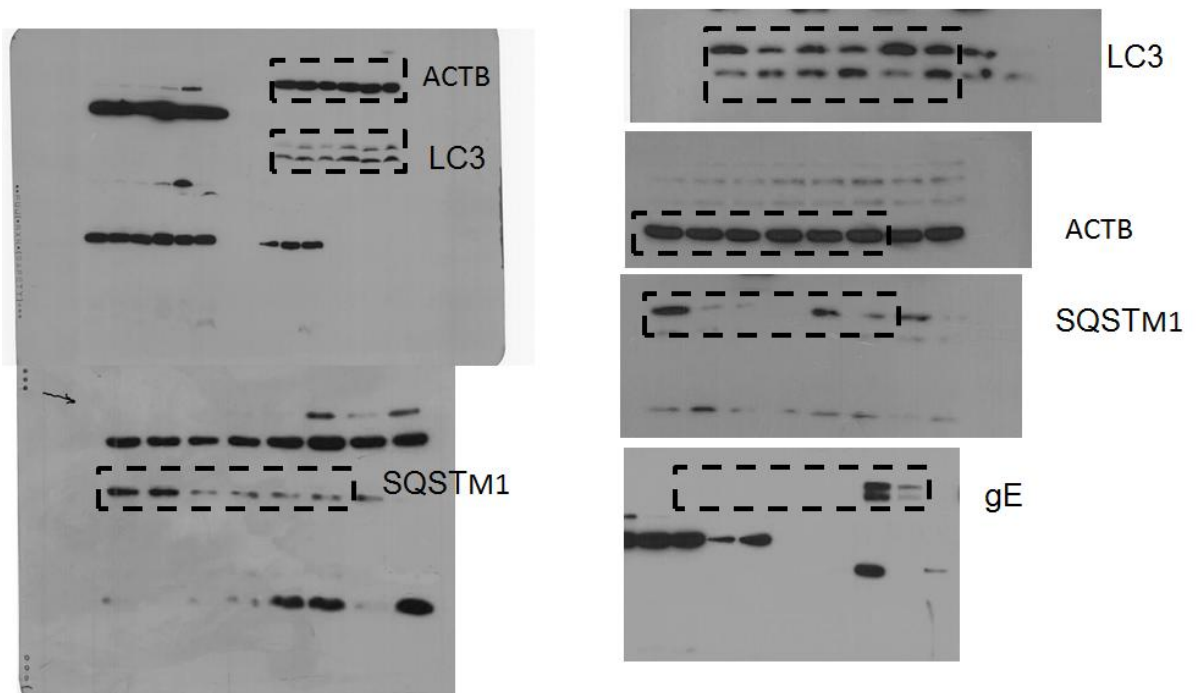

**Figure S4 the effect of rapamycin and 3-MA on PRV infected cells**

Figure S4 showed the raw uncropped images of figure6a and e.

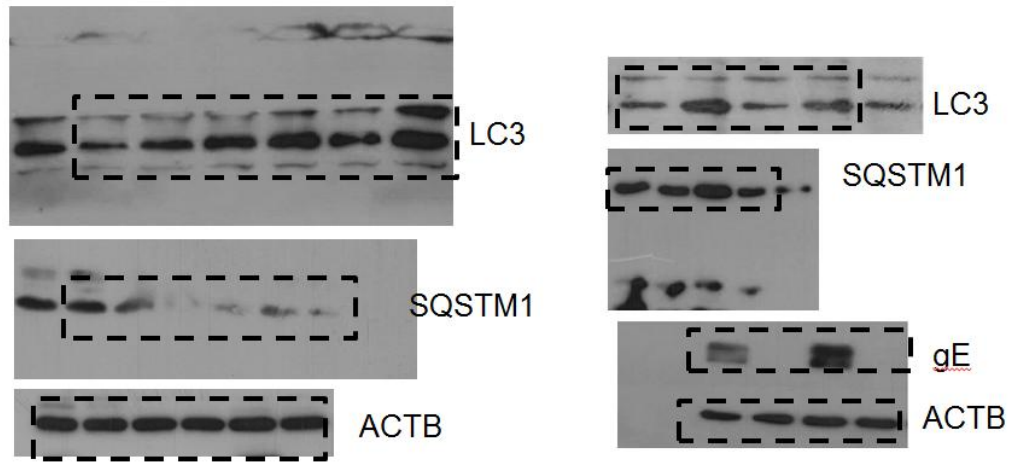

**Figure S5 autophagy level after ATG genes silencing**

Figure S5 showed the raw uncropped images of figure7a.

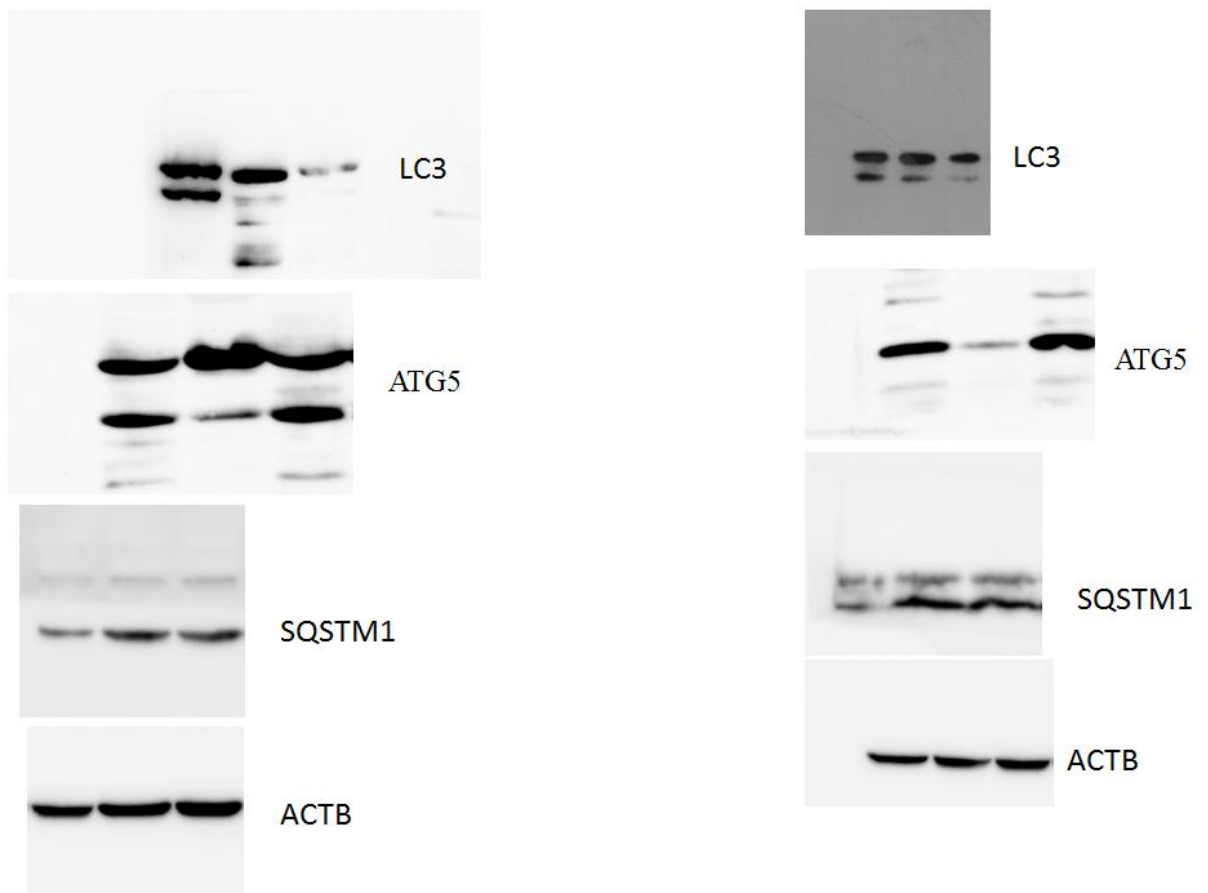

## Figure S6 the US3 protein inhibits the autophagy response

Figure S2 showed the raw uncropped images of figure 8a and b.

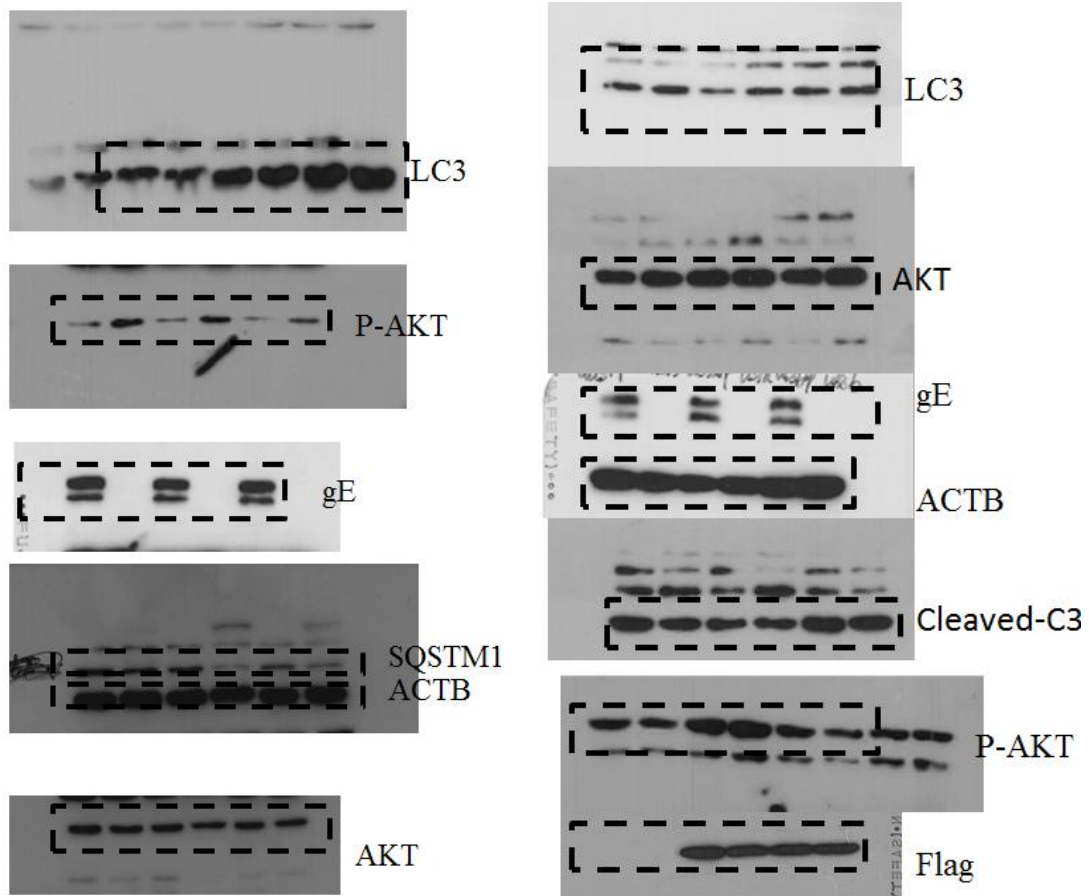

### Figure S7 UV-inactivated PRV

The infectivity of inactivated PRV was detected by titration and IFA assay. The virus samples with 10-fold dilutions were added into 6-well plate with monolayer of Vero cells to test plaque formation. As shown in Figure S7, UV-inactivated PRV did not format plaque and there was no IFA signal specific for the gE protein of PRV, indicating that the inactivated PRV virion is not infective.

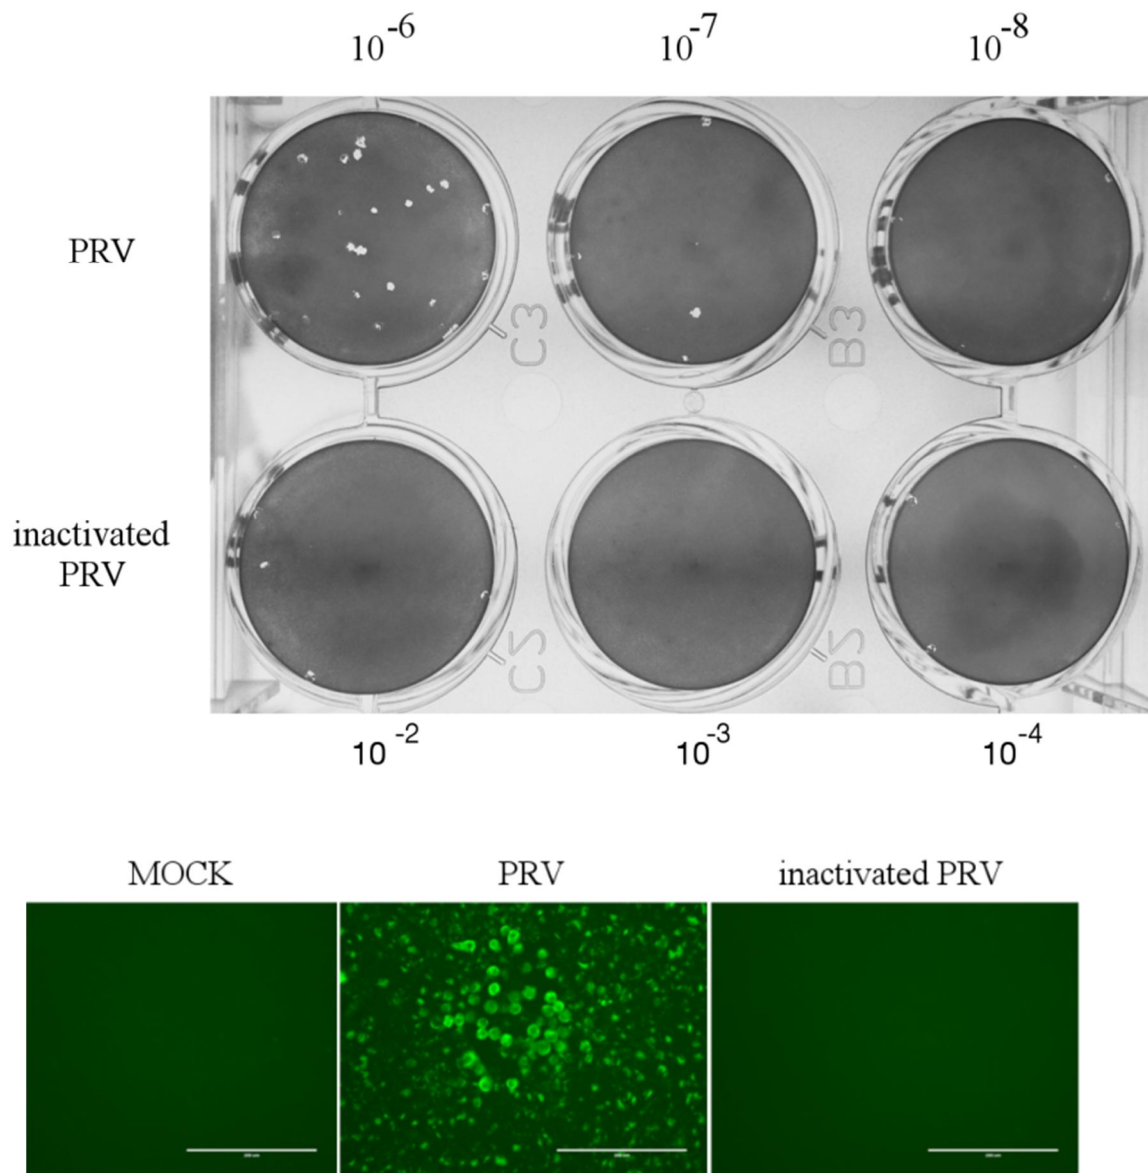

## Supplementary Table S1

Table S1. The primer sequences used for Q-PCR and plasmids construction

| Gene           | Primer sequence (5'-3')                                         |
|----------------|-----------------------------------------------------------------|
| gB             | Forward GTCACCTTGTGGTTGTTG                                      |
|                | Reverse CCACATCTACTACAAGAACG                                    |
| $\beta$ -actin | Forward CTCCTGGGCATGGAGTCC                                      |
|                | Reverse GCGCGATGATCTTGATCTTC                                    |
| US3-FLAG       | Forward ATTTAAGCTTGCCACCATGGCCGACGCCGGAATCCCCGACGAGA            |
|                | Reverse<br>GGTTGAATTCTTACTTATCGTCGTCATCCTTGTAATCTACGGTCCACATTCC |
| US3-RFP        | Forward CTAGCTAGCGCCACCATGGCCGACGCCGGAATCCCCGA                  |
|                | Reverse TCCGGAATTCGTTATACGGTCCACATTCCAAAGTTG                    |
| US3(D223A)     | Forward TACGACACCAAGGTCGCGGTCTGGGGTGCG                          |
|                | Reverse CGCACCCCAGACCGCGACCTTGGTGTCGTA                          |
| US3(K136G)     | Forward ACGGTGGTGCTGCAGGTGGGCCAGA                               |
|                | Reverse TCTGGCCCACCTGCAGCACCACCGT                               |
